# Supplementary material for: Sensitive detection of caspase-3 enzymatic activities and inhibitor screening by mass spectrometry with dual maleimide labelling quantitation
Source: Royal Society of Chemistry journal article supplement (doi:10.1039/c9an01458f), 2019-01-01
Supplement: c9an01458f1.pdf [file c9an01458f1.pdf]

## Supplementary Information

### **Sensitive detection of caspase-3 enzymatic activities and inhibitor screening by mass spectrometry with dual maleimides labelling quantitation**

Fuzhong Ouyang<sup>a</sup>, Tianrong Yu<sup>a</sup>, Chao Gu<sup>b</sup>, Guanghui Wang<sup>b</sup>, Rui Shi<sup>a</sup>, Rui Lv<sup>a</sup>, Enhui Wu<sup>a</sup>, Chongqing Ma<sup>a</sup>, Ruochen Guo<sup>a</sup>, Jing Li<sup>a</sup>, Anna Zaczek<sup>c</sup>, Jian Liu<sup>\*a</sup>

<sup>a</sup> Institute of Functional Nano and Soft Materials (FUNSOM), Jiangsu Key Laboratory for Carbon-Based Functional Materials and Devices, Soochow University, Suzhou, Jiangsu Province 215123, China.

<sup>b</sup> Jiangsu Key Laboratory of Translational Research and Therapy for Neuro-Psycho-Diseases, College of Pharmaceutical Sciences, Soochow University, Suzhou, Jiangsu Province 215123, China.

<sup>c</sup> Medical Biotechnology Department, Intercollegiate Faculty of Biotechnology, University of Gdansk and Medical University of Gdansk, Debinki 1, Gdansk, 80-211, Poland

E-mail: [jliu@suda.edu.cn](mailto:jliu@suda.edu.cn)

iMINTS Lab, <http://web.suda.edu.cn/jliu/>

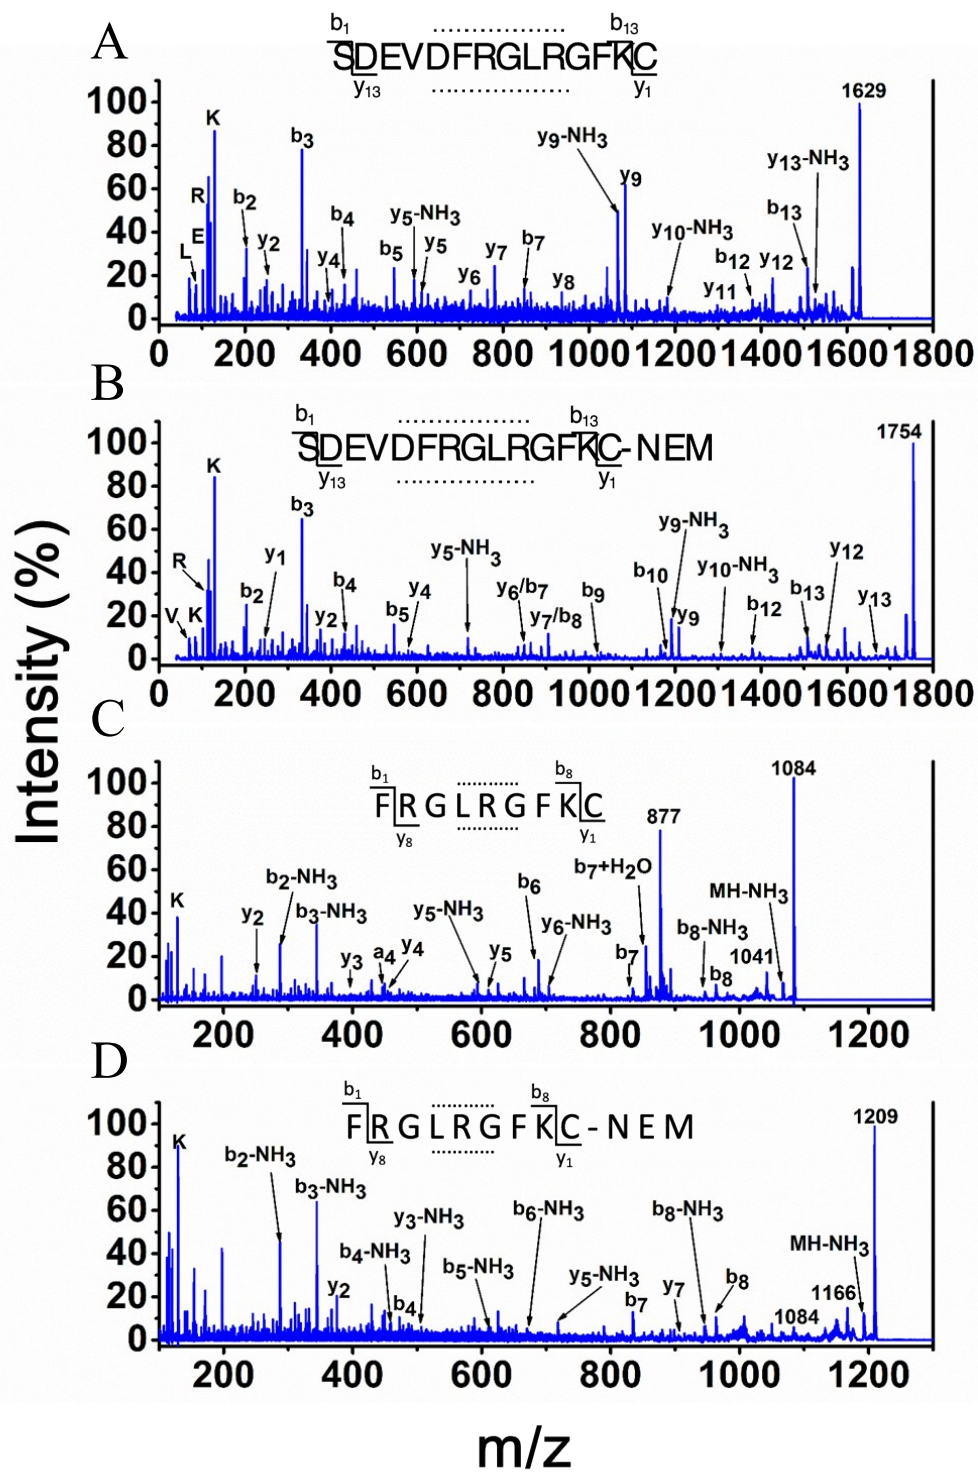

**Figure S1.** MS/MS spectra of (A) unlabeled P1 at m/z 1629, (B) NEM-P1 at m/z 1754, (C) fragment of caspase-3 cleaved P1 at m/z 1084 and (D) fragment of caspase-3 cleaved NEM-P1 at m/z 1209.

**Table S1.** List of b- and y-type of fragments generated from the parent ion peak at m/z of 1629.

| Name of fragment | Theoretical m/z | Name of fragment | Theoretical m/z |
|------------------|-----------------|------------------|-----------------|
| b <sub>2</sub>   | 203.06          | Y <sub>2</sub>   | 250.12          |
| b <sub>3</sub>   | 332.11          | Y <sub>4</sub>   | 454.21          |
| b <sub>4</sub>   | 431.18          | Y <sub>5</sub>   | 610.31          |
| b <sub>5</sub>   | 546.20          | Y <sub>6</sub>   | 723.40          |
| b <sub>7</sub>   | 849.37          | Y <sub>7</sub>   | 780.42          |
| b <sub>12</sub>  | 1379.67         | Y <sub>8</sub>   | 936.52          |
| b <sub>13</sub>  | 1507.77         | Y <sub>9</sub>   | 1083.59         |

**Table S2.** List of b- and y-type of fragments generated from the parent ion peak at m/z of 1754.

| Name of fragment | Theoretical m/z | Name of fragment | Theoretical m/z |
|------------------|-----------------|------------------|-----------------|
| b <sub>2</sub>   | 203.06          | Y <sub>1</sub>   | 247.16          |
| b <sub>3</sub>   | 332.11          | Y <sub>2</sub>   | 375.25          |
| b <sub>4</sub>   | 431.18          | Y <sub>4</sub>   | 579.34          |
| b <sub>5</sub>   | 546.20          | Y <sub>6</sub>   | 848.53          |
| b <sub>7</sub>   | 849.37          | Y <sub>7</sub>   | 905.55          |
| b <sub>12</sub>  | 1379.67         | Y <sub>9</sub>   | 1208.72         |
| b <sub>13</sub>  | 1507.77         | Y <sub>12</sub>  | 1551.86         |

**Table S3.** List of b- and y-type of fragments generated from the parent ion peak at m/z of 1084.

| Name of fragment                 | Theoretical m/z | Name of fragment                | Theoretical m/z |
|----------------------------------|-----------------|---------------------------------|-----------------|
| b <sub>2</sub> -NH <sub>3</sub>  | 287.15          | Y <sub>2</sub>                  | 250.12          |
| b <sub>3</sub> -NH <sub>3</sub>  | 344.17          | Y <sub>3</sub>                  | 397.19          |
| b <sub>6</sub>                   | 687.40          | Y <sub>4</sub>                  | 454.21          |
| b <sub>7</sub>                   | 834.47          | Y <sub>5</sub> -NH <sub>3</sub> | 593.29          |
| b <sub>7</sub> +H <sub>2</sub> O | 852.47          | Y <sub>5</sub>                  | 610.31          |
| b <sub>8</sub> -NH <sub>3</sub>  | 945.54          | Y <sub>6</sub> -NH <sub>3</sub> | 706.37          |
| b <sub>8</sub>                   | 962.57          | K                               | 126.09          |

**Table S4.** List of b- and y-type of fragments generated from the parent ion peak at m/z of 1209.

| Name of fragment                | Theoretical m/z | Name of fragment                | Theoretical m/z |
|---------------------------------|-----------------|---------------------------------|-----------------|
| b <sub>2</sub> -NH <sub>3</sub> | 287.15          | Y <sub>2</sub>                  | 375.25          |
| b <sub>3</sub> -NH <sub>3</sub> | 344.17          | Y <sub>3</sub> -NH <sub>3</sub> | 505.29          |
| b <sub>4</sub>                  | 474.28          | Y <sub>5</sub> -NH <sub>3</sub> | 718.42          |
| b <sub>5</sub> -NH <sub>3</sub> | 613.36          | Y <sub>7</sub>                  | 905.55          |
| b <sub>6</sub> -NH <sub>3</sub> | 670.38          | b <sub>8</sub> -NH <sub>3</sub> | 945.54          |
| b <sub>7</sub>                  | 834.47          | MH-NH <sub>3</sub>              | 1066.56         |
| b <sub>8</sub>                  | 962.57          | K                               | 126.09          |

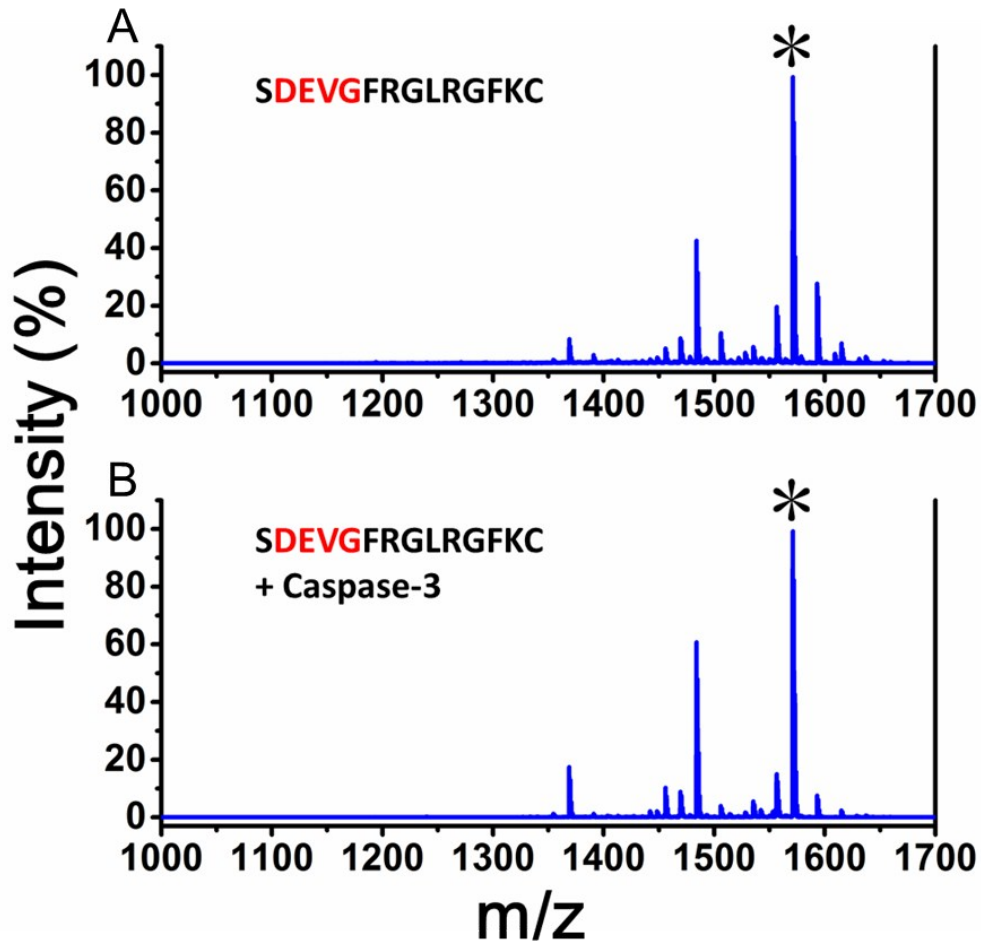

**Figure S2.** Mass spectra of control peptide P3 before (A) and after (B) incubation with 10  $\mu$ L 2  $\mu$ g/mL of caspase-3 at 37  $^{\circ}$ C for 1 h. The result suggests that P3 cannot be cleaved by caspase-3.

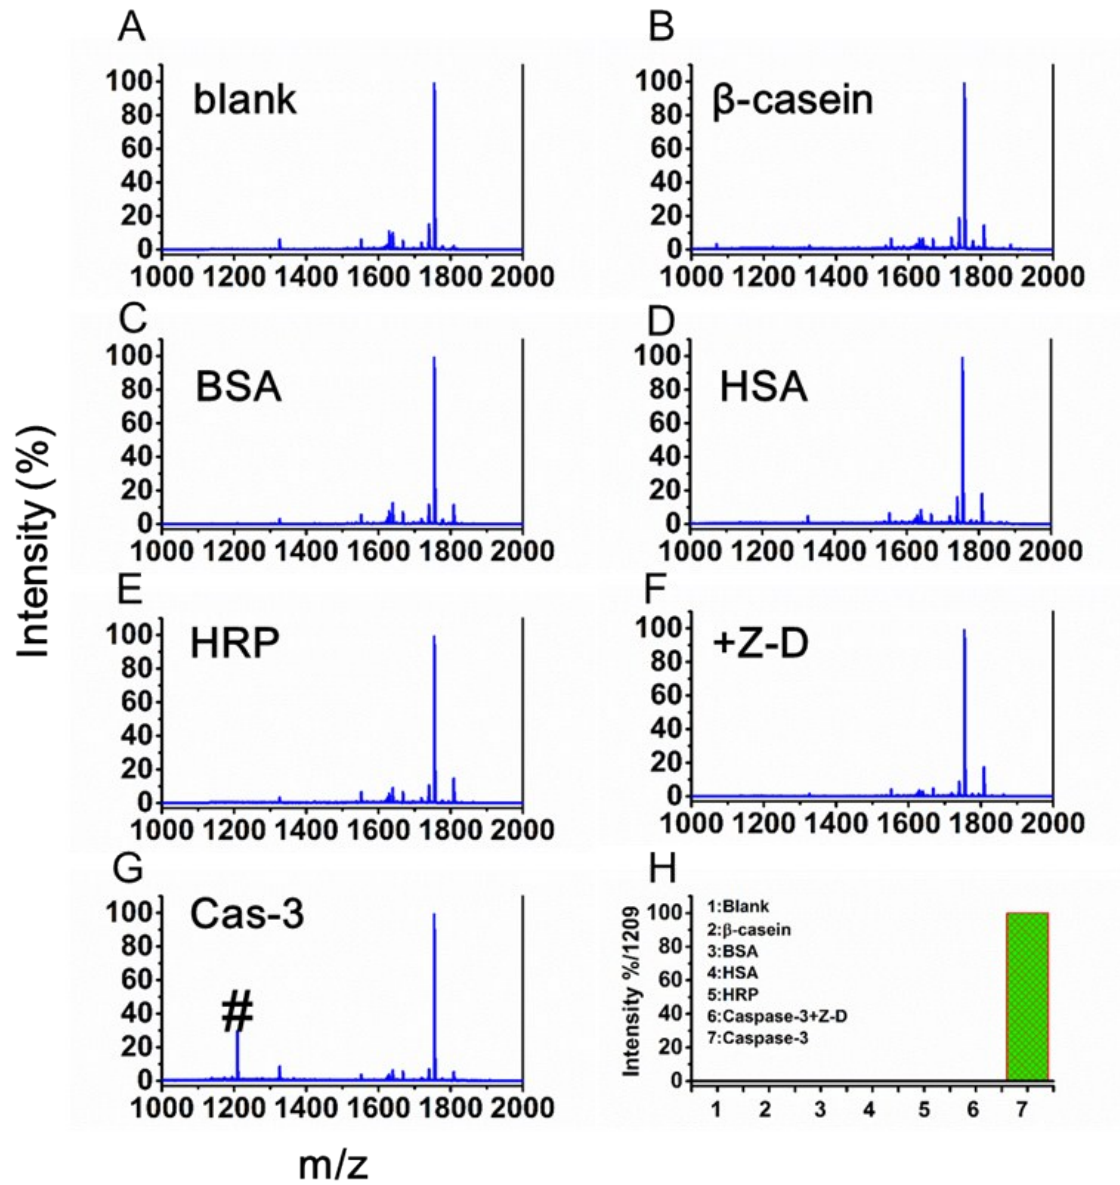

**Figure S3.** Mass spectra of 50  $\mu$ M NEM-P1 incubated with 200 ng/ml different proteins or enzymes at 37  $^{\circ}$ C for 1 h. (A) blank, (B)  $\beta$ -casein, (C) BSA, (D) HSA, (E) HRP, (F) caspase-3 with inhibitor Z-DEVD-FMK, (G) caspase-3 alone. (H) Intensity of enzyme cleaved fragment at m/z of 1209 for different samples. The result suggests NEM-P1 can be specifically cleaved by caspase-3.

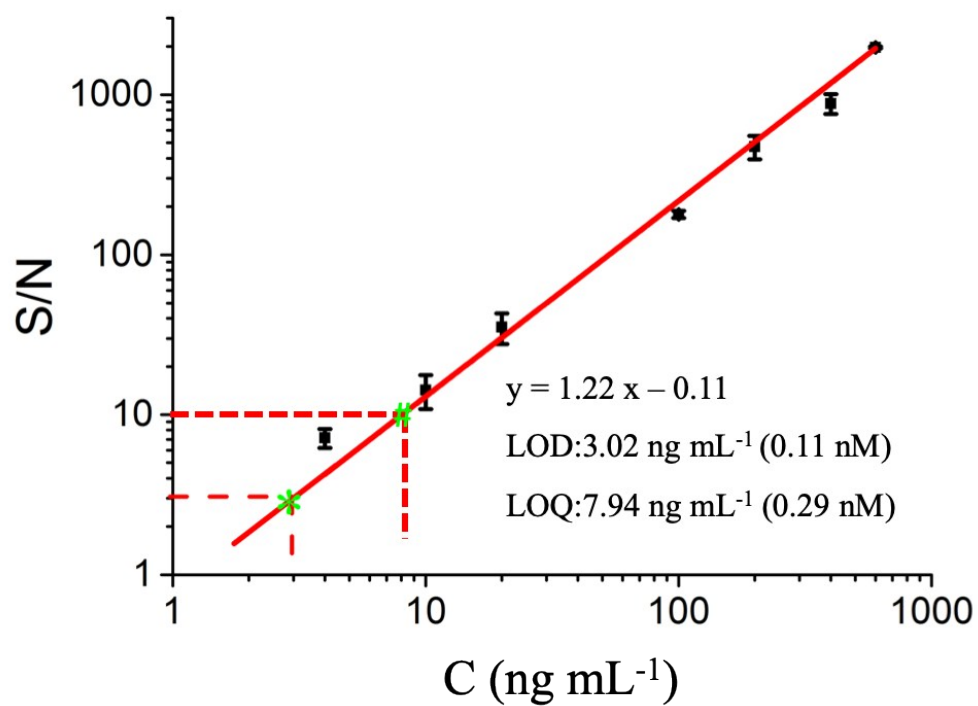

**Figure S4.** Limit of detection (LOD) and quantitation (LOQ) for quantitative detection of caspae-3 activity *in vitro*. The LOD was calculated by extrapolating the calibration curve till  $S/N = 3$ , and  $S/N=10$  for LOQ. Error bar: standard deviation ( $n=3$ ).

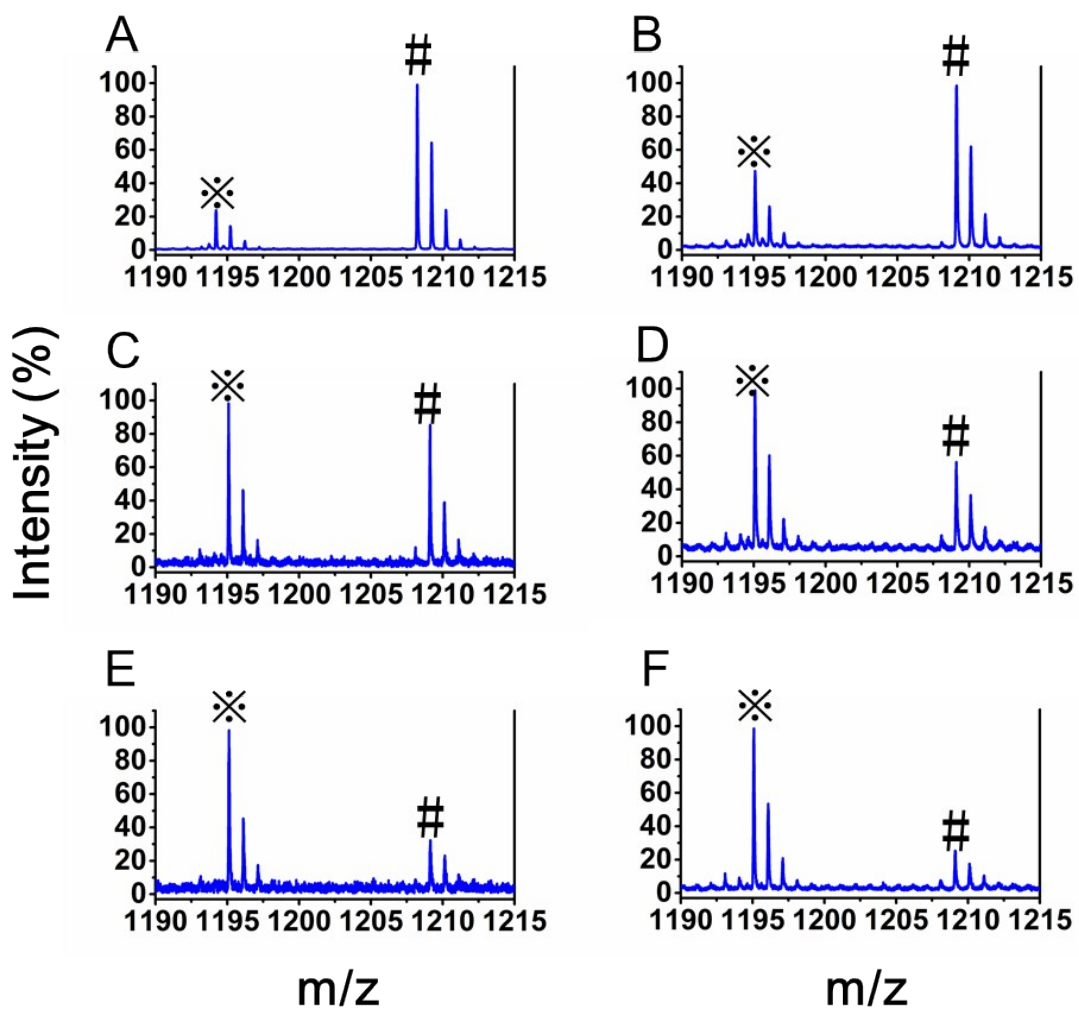

**Figure S5.** Mass spectra of 50  $\mu\text{M}$  NEM-P1 incubated with 200 ng/mL caspase-3 and different concentrations of its inhibitor Emricasan at 37  $^{\circ}\text{C}$  for 120 min. The concentration from (A) to (F) is 0, 10, 50, 100, 500 and 10000 nM, respectively. \* protonated internal standard NMM-P2 at m/z 1195, # protonated enzyme cleaved fragment from NEM-P1 at m/z 1209



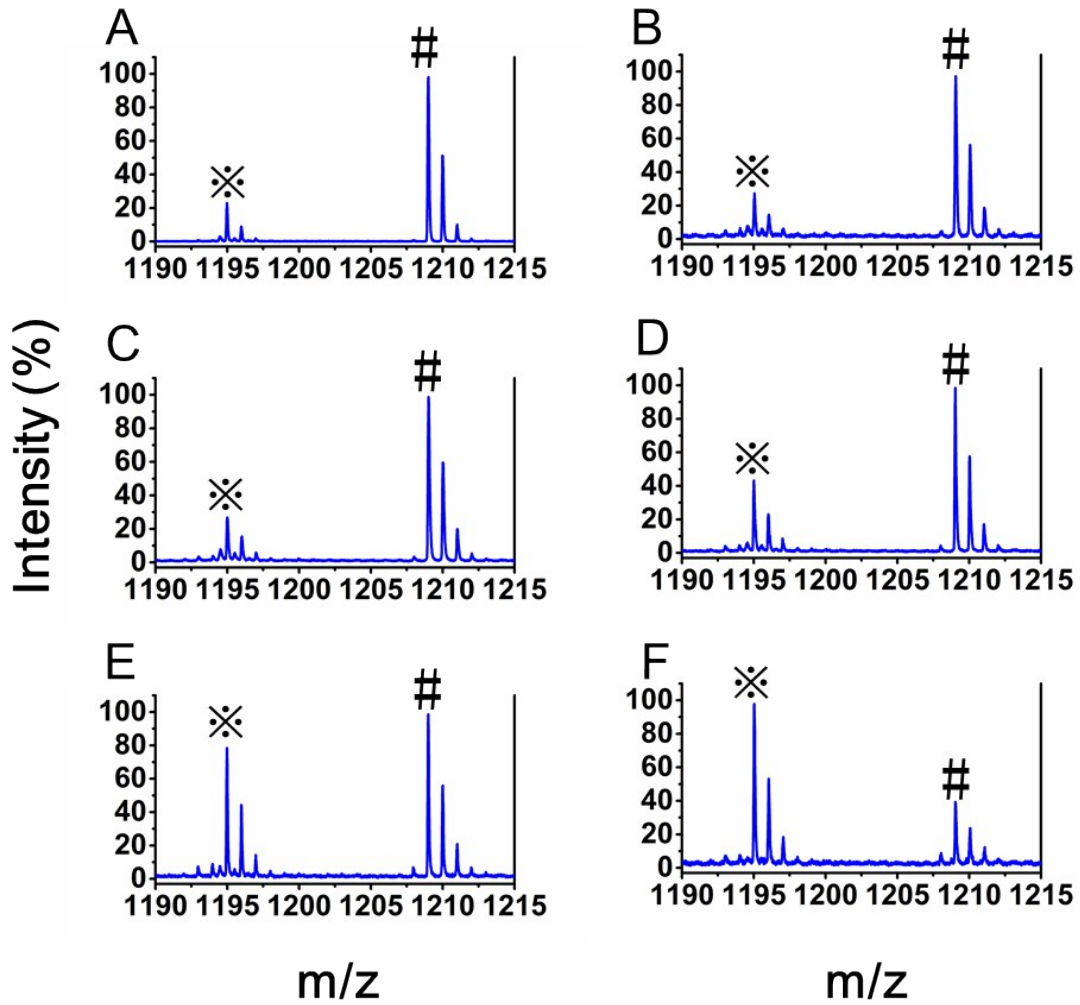

**Figure S6.** Mass spectra of 50  $\mu$ M NEM-P1 incubated with 200 ng/mL caspase-3 and different concentrations of its inhibitor Z-DEVD-FMK at 37°C for 120 min. The concentration from (A) to (F) is 0, 10, 100, 500, 1000 and 10000 nM, respectively. ✖ protonated internal standard NMM-P2 at m/z 1195, # protonated enzyme cleaved fragment from NEM-P1 at m/z 1209.

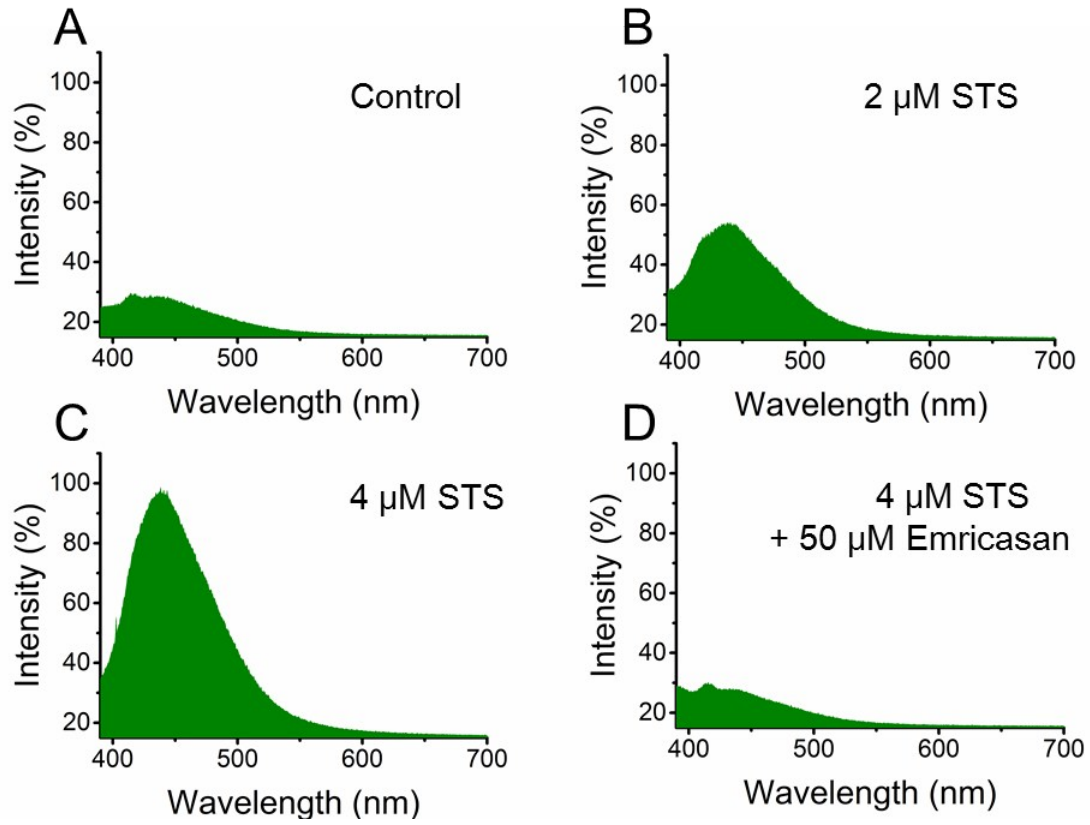

**Figure S7.** Fluorescence images of caspase-3 activity detection in PC12 cell lysates treated with (A) 0, (B) 2, (C) 4  $\mu$ M STS, and (D) 4  $\mu$ M STS and 50  $\mu$ M inhibitor Emricasan. The cell density was 900,000 cells/dish, and the commercial fluorescence probe was 5  $\mu$ M AC-DEVD-AMC.
